# Supplementary material for: Effects of Tea Treatments against High-Fat Diet-Induced Disorder by Regulating Lipid Metabolism and the Gut Microbiota
Source: Hindawi journal article supplement (doi:10.1155/2022/9336080), 2022-05-29
Supplement: f1 [file 9336080.f1.docx]

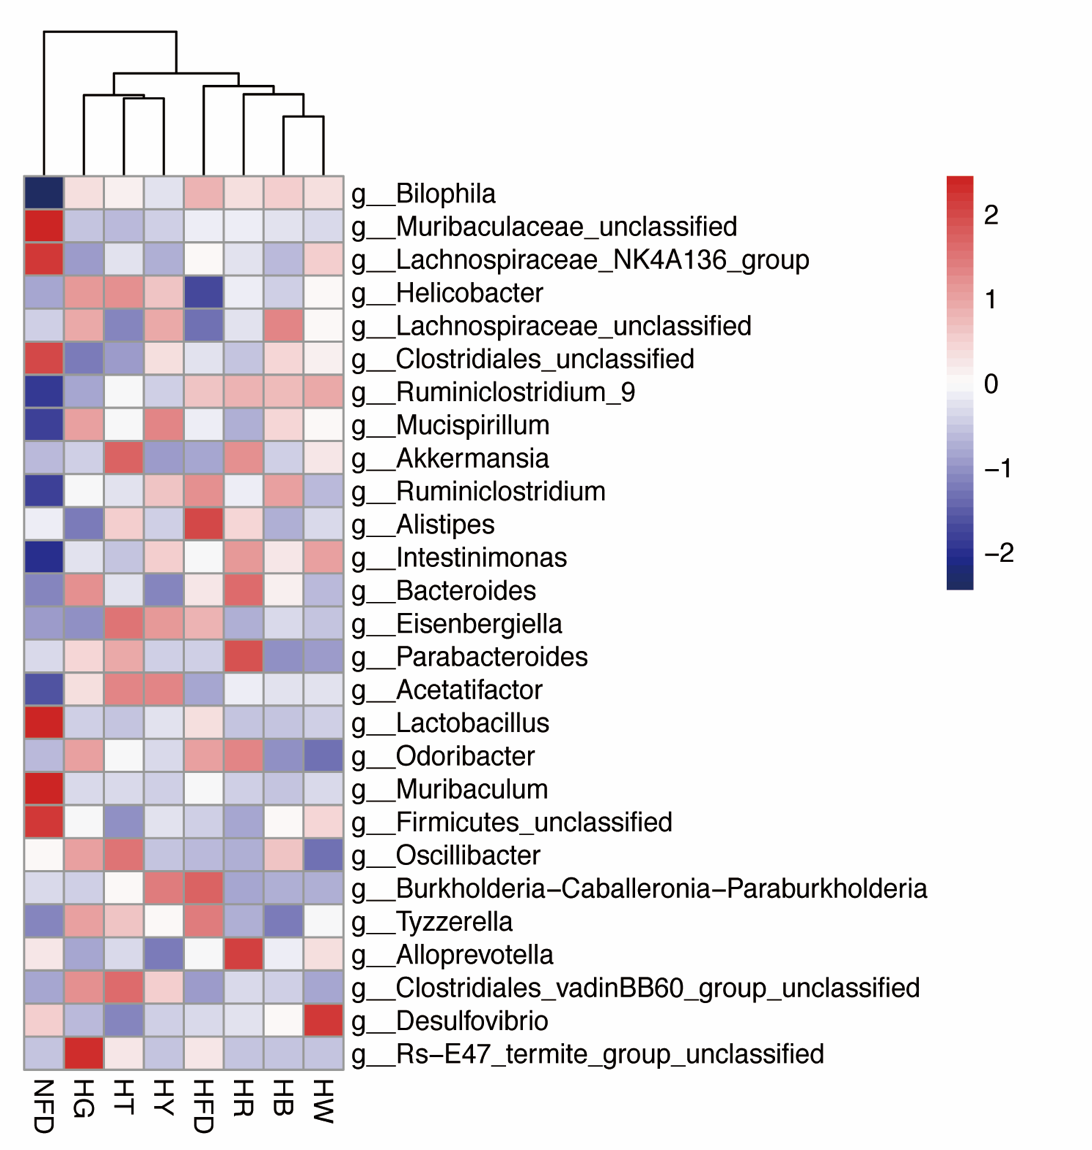


Figure S1. Taxa abundance cluster analysis at the genus level.


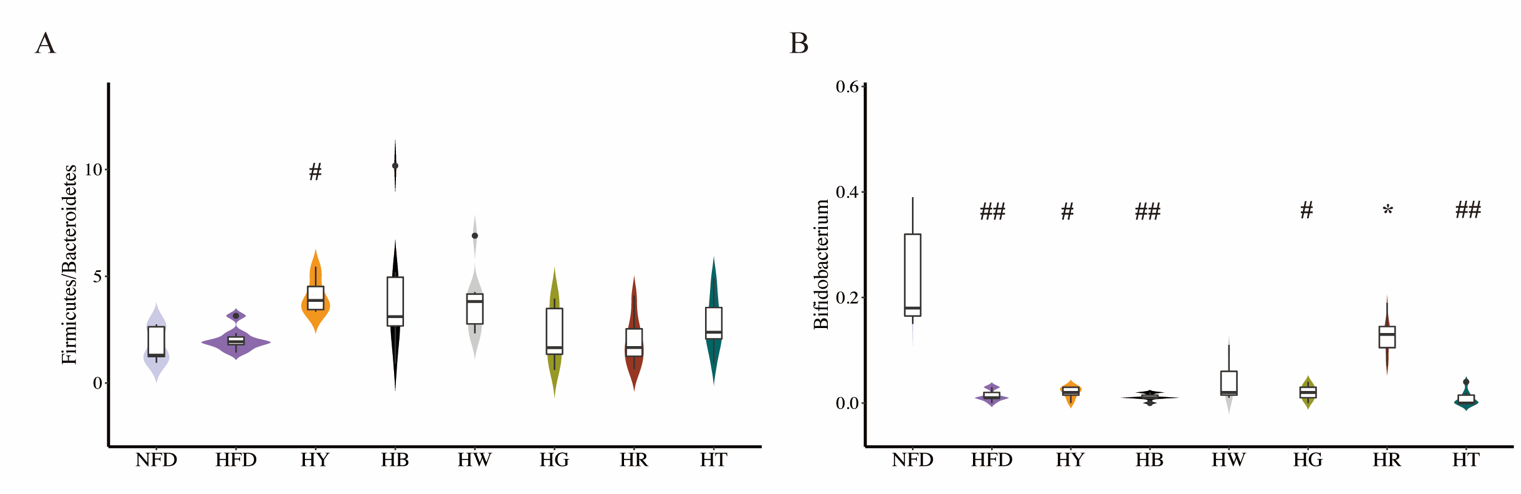


Figure S2. (A) Firmicutes to Bacteroidetes (F/B) ratio (relative abundance of Firmicutes/relative abundance of Bacteroidetes). (B) The relative abundance of *Bifidobacterium*. Kruskal-Wallis test with Dunn’s multiple comparison test. # p<0.05, ## p<0.01, compared with the NFD group.


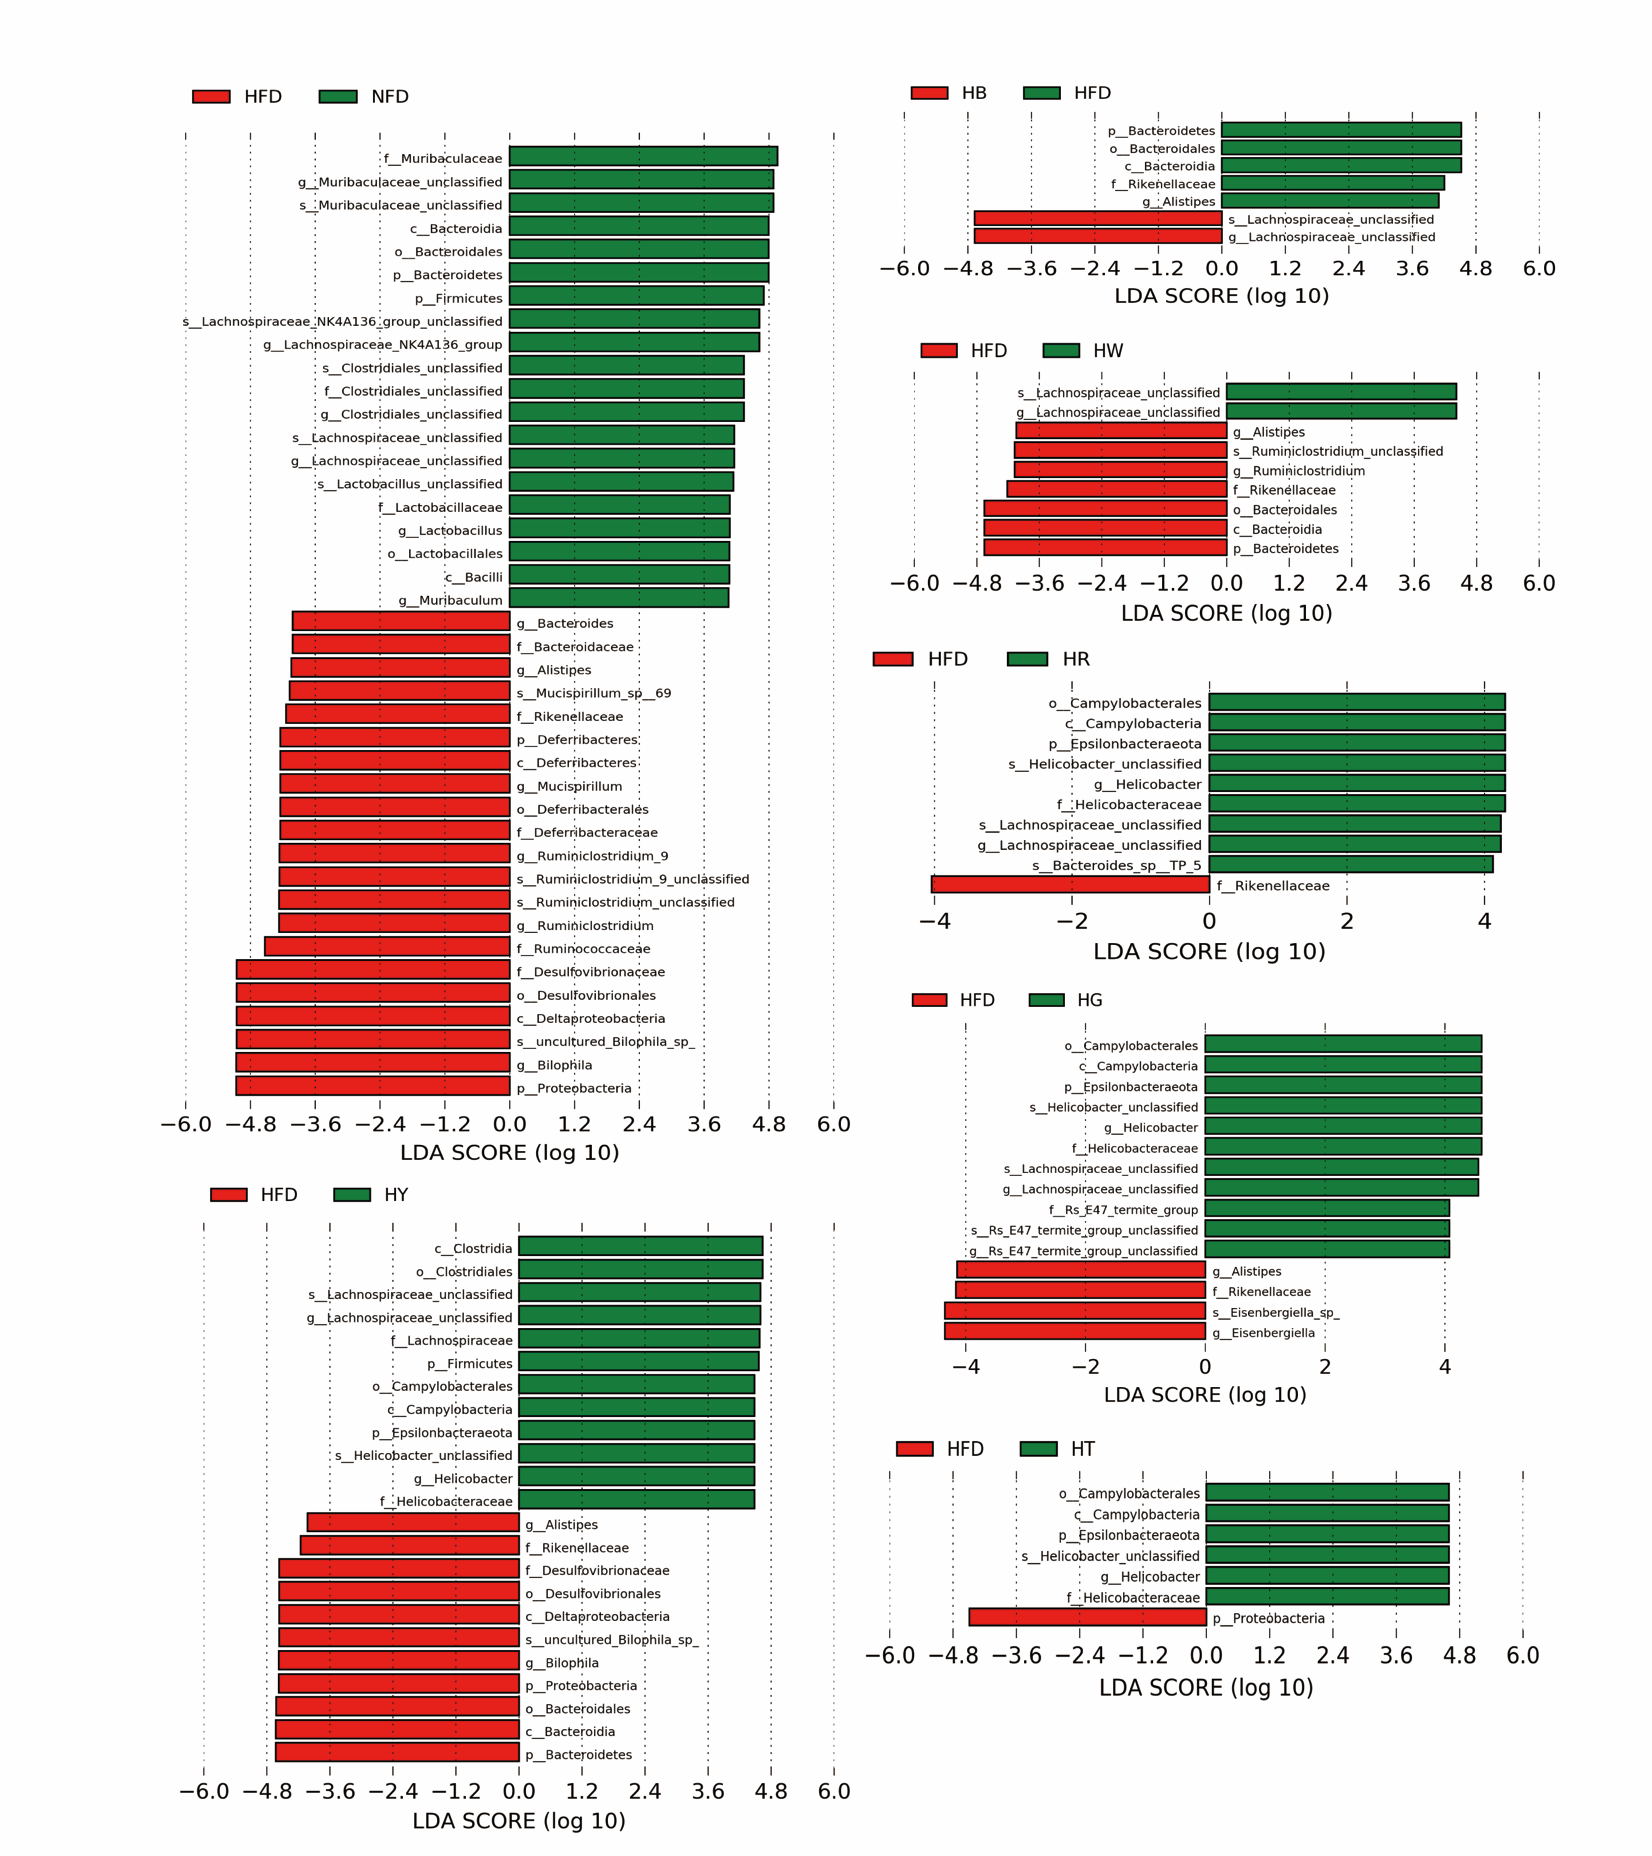


Figure S3. LDA scores of differentially abundant taxa between the HFD group and other groups using the LEfSe method.
